# Supplementary material
Source: PubMed Central journal article supplement (PMC7098431)
Supplement: NIHMS1063226-supplement-1.pdf [file NIHMS1063226-supplement-1.pdf]

**Supplemental Figure 1.** Exclusion and inclusion criteria used to develop final analytic cohort.

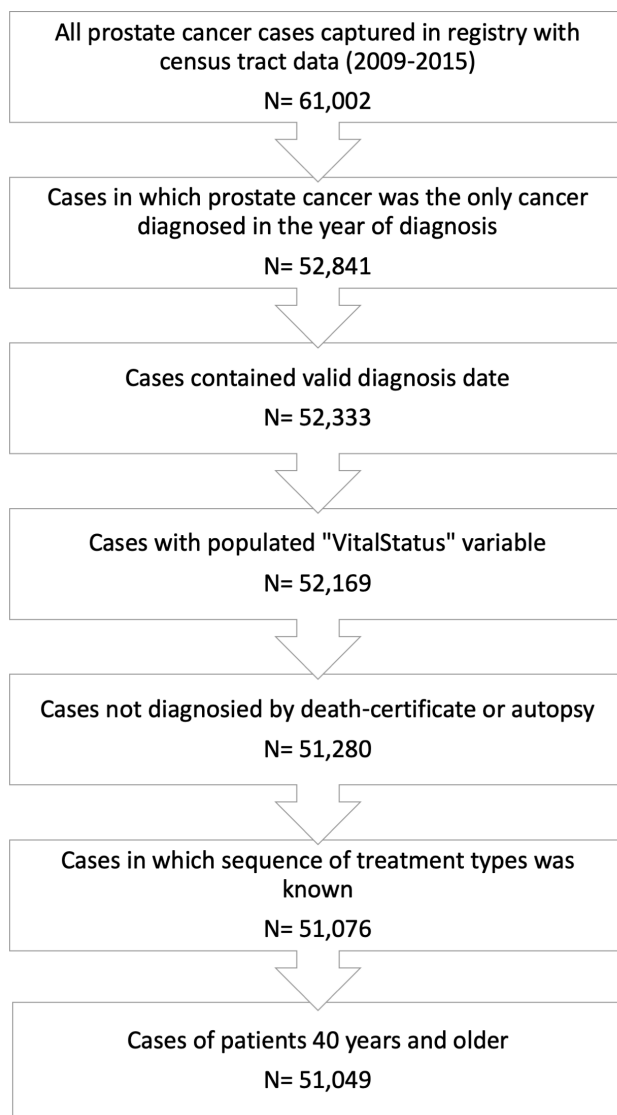

**Supplemental Figure 2.** Unadjusted 3-year mortality (diagnosed 2009-2012) (A) and unadjusted 5-year mortality (diagnosed 2009-2010) (B).

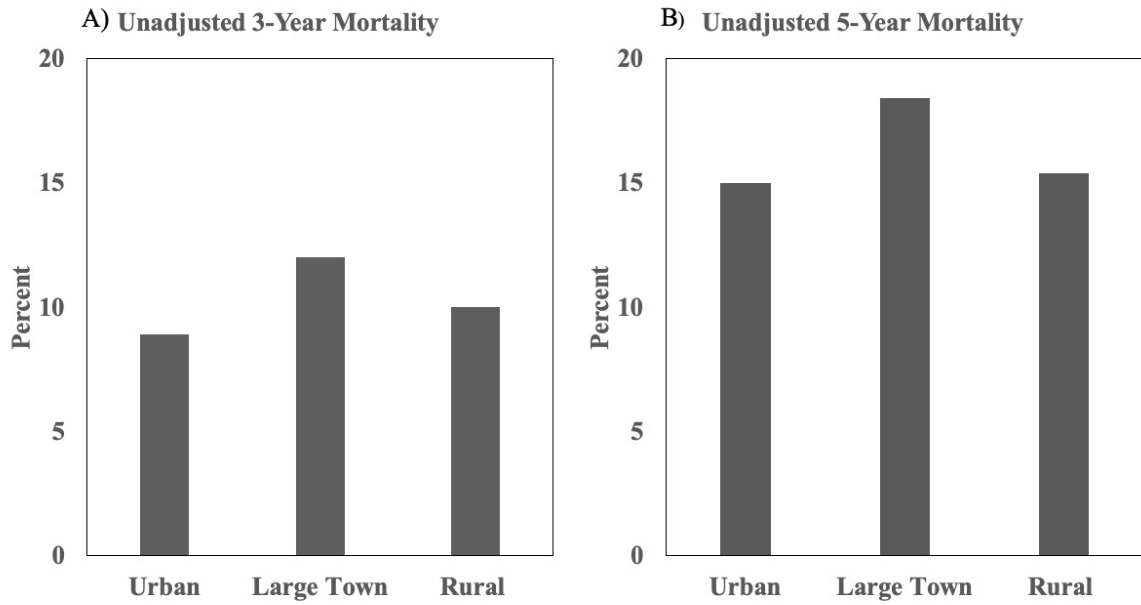

**Supplemental Table 1. Rural-Urban Commuting Codes (RUCA)**

| <b>Primary RUCA Code</b> | <b>RUCA Category</b>                                                                                           |
|--------------------------|----------------------------------------------------------------------------------------------------------------|
| 1                        | <b>1-Metropolitan area core: primary flow within an Urbanized Area</b>                                         |
| 2                        | <b>2-Metropolitan area high commuting: primary flow 30% or more to a UA</b>                                    |
| 3                        | <b>3-Metropolitan area low commuting: primary flow 10% to 30% to a UA</b>                                      |
| 4                        | <b>4-Micropolitan area core: primary flow within an Urban Cluster (UC) of 10,000 through 49,999 (large UC)</b> |
| 5                        | <b>5-Micropolitan high commuting: primary flow 30% or more to a large UC</b>                                   |
| 6                        | <b>6-Micropolitan low commuting: primary flow 10% to 30% to a large UC</b>                                     |
| 7                        | <b>7-Small town core: primary flow within an Urban Cluster of 2,500 through 9,999 (small UC)</b>               |
| 8                        | <b>8-Small town high commuting: primary flow 30% or more to a small UC</b>                                     |
| 9                        | <b>9-Small town low commuting: primary flow 10% through 29% to a small UC</b>                                  |
| 10                       | <b>10-Rural areas: primary flow to a tract outside a UA or UC (including self)</b>                             |
| 99                       | <b>Not coded: Census tract has zero population and no rural-urban identifier information</b>                   |

**Supplemental Table 2.** Multivariate Regression Analysis: Predictors of Treatment, stratified by low and intermediate/high risk prostate cancer, with addition of area deprivation index and urologist density as covariates.

|                                 | <b>Treatment vs. No Treatment (All Patients) Odds Ratio [CI] N=51,049</b> | <b>Treatment vs. No Treatment (Low-risk patients only) Odds Ratio (CI) N=13,176</b> | <b>Treatment vs. No Treatment (Intermediate-risk patients only) Odds Ratio (CI) N=19,572</b> | <b>Treatment vs. No Treatment (High-risk patients only) Odds Ratio (CI) N=8,672</b> |
|---------------------------------|---------------------------------------------------------------------------|-------------------------------------------------------------------------------------|----------------------------------------------------------------------------------------------|-------------------------------------------------------------------------------------|
| <b>Sample Description</b>       | <i>Entire cohort</i>                                                      | <i>Gleason ≤ 6 &amp; PSA ≤ 10</i>                                                   | <i>Gleason = 7 OR PSA &gt;10 but ≤20</i>                                                     | <i>Gleason = 8-10 OR PSA &gt; 20</i>                                                |
| <b>RUCA Groups</b>              |                                                                           |                                                                                     |                                                                                              |                                                                                     |
| Urban                           | Reference                                                                 | Reference                                                                           | Reference                                                                                    | Reference                                                                           |
| Large Town                      | 0.81 (0.73-0.90)                                                          | 0.77 (0.66-0.89)                                                                    | 0.82 (0.66-1.00)                                                                             | 0.88 (0.70-1.11)                                                                    |
| Rural                           | 0.87 (0.76-1.00)                                                          | 0.85 (0.69-1.03)                                                                    | 0.97 (0.76-1.26)                                                                             | 0.79 (0.59-1.06)                                                                    |
| <b>Median Age (year)</b>        |                                                                           |                                                                                     |                                                                                              |                                                                                     |
| 40-54                           | Reference                                                                 | Reference                                                                           | Reference                                                                                    | Reference                                                                           |
| 55-59                           | 0.78 (0.69-0.89)                                                          | 0.79 (0.67-0.91)                                                                    | 0.76 (0.58-0.99)                                                                             | 0.88 (0.61-1.27)                                                                    |
| 60-64                           | 0.63 (0.56-0.71)                                                          | 0.58 (0.50-0.67)                                                                    | 0.73 (0.56-0.93)                                                                             | 0.84 (0.59-1.18)                                                                    |
| 65-69                           | 0.57 (0.50-0.64)                                                          | 0.49 (0.42-0.58)                                                                    | 0.65 (0.50-0.84)                                                                             | 0.85 (0.60-1.19)                                                                    |
| 70-74                           | 0.49 (0.43-0.56)                                                          | 0.42 (0.35-0.50)                                                                    | 0.50 (0.38-0.65)                                                                             | 0.84 (0.59-1.18)                                                                    |
| >74                             | 0.28 (0.24-0.32)                                                          | 0.24 (0.19-0.29)                                                                    | 0.30 (0.23-0.39)                                                                             | 0.42 (0.30-0.57)                                                                    |
| <b>Race</b>                     |                                                                           |                                                                                     |                                                                                              |                                                                                     |
| Non-Hispanic White              | Reference                                                                 | Reference                                                                           | Reference                                                                                    | Reference                                                                           |
| Non-White                       | 0.76 (0.69-0.83)                                                          | 0.77 (0.68-0.88)                                                                    | 0.71 (0.60-0.83)                                                                             | 0.81 (0.68-0.97)                                                                    |
| Unknown                         | 2.17 (1.76-2.68)                                                          | 2.28 (1.71-3.07)                                                                    | 3.56 (2.26-5.80)                                                                             | 1.28 (0.84-1.97)                                                                    |
| <b>Insurance Status</b>         |                                                                           |                                                                                     |                                                                                              |                                                                                     |
| Private                         | Reference                                                                 | Reference                                                                           | Reference                                                                                    | Reference                                                                           |
| Medicare                        | 0.82 (0.76-0.89)                                                          | 0.88 (0.78-0.99)                                                                    | 0.78 (0.67-0.91)                                                                             | 0.76 (0.64-0.92)                                                                    |
| Medicaid                        | 0.74 (0.63-0.83)                                                          | 0.84 (0.64-1.10)                                                                    | 0.74 (0.54-1.03)                                                                             | 0.66 (0.48-0.90)                                                                    |
| Uninsured                       | 0.49 (0.35-0.70)                                                          | 0.45 (0.26-0.79)                                                                    | 0.55 (.27-1.24)                                                                              | 0.52 (0.30-0.95)                                                                    |
| Other/NOS/Military              | 0.87 (0.77-0.97)                                                          | 0.95 (0.82-1.11)                                                                    | 0.68 (0.55-0.84)                                                                             | 0.91 (0.69-1.23)                                                                    |
| Unknown                         | 1.3 (1.10-1.59)                                                           | 1.37 (1.07-1.80)                                                                    | 1.02 (0.73-1.51)                                                                             | 1.46 (0.99-2.18)                                                                    |
| <b>Stage at Diagnosis</b>       |                                                                           |                                                                                     |                                                                                              |                                                                                     |
| Localized                       | Reference                                                                 | Reference                                                                           | Reference                                                                                    | Reference                                                                           |
| Regional Extension              | 8.91 (7.22-11.13)                                                         | 35.26 (18.11-82.42)                                                                 | 11.13 (7.46-17.57)                                                                           | 5.13 (3.93-6.83)                                                                    |
| Distant Metastasis              | 2.04 (1.73-2.41)                                                          | 3.21 (0.55-61.26)                                                                   | 1.49 (0.70-3.69)                                                                             | 2.16 (1.81-2.57)                                                                    |
| Unknown                         | 0.25 (0.21-0.30)                                                          | 0.20 (0.15-0.27)                                                                    | 0.22 (0.15-0.31)                                                                             | 0.34 (0.26-0.45)                                                                    |
| <b>PSA at Diagnosis (ng/mL)</b> |                                                                           |                                                                                     |                                                                                              |                                                                                     |
| ≤10                             | Reference                                                                 | Reference                                                                           | Reference                                                                                    | Reference                                                                           |
| 10.1– 20                        | 0.96 (.88-1.06)                                                           | --                                                                                  | 0.91 (0.77-1.07)                                                                             | 0.82 (0.65-1.05)                                                                    |

|                                              |                   |                  |                   |                    |
|----------------------------------------------|-------------------|------------------|-------------------|--------------------|
| >20                                          | 0.68 (0.60-0.77)  | --               | --                | 0.57 (0.46-0.70)   |
| Unknown                                      | 0.16 (0.13-0.20)  | --               | --                | 0.14 (0.11-0.18)   |
| <b><i>Gleason Score on biopsy</i></b>        |                   |                  |                   |                    |
| ≤6                                           | Reference         | Reference        | Reference         | Reference          |
| 3+4                                          | 3.55 (3.28-3.85)  | --               | 3.17 (2.59-3.89)  | 2.58 (1.82-3.67)   |
| 4+3                                          | 4.16 (3.72-4.66)  | --               | 3.86 (3.12-4.80)  | 2.42 (1.72-3.42)   |
| 7 NOS                                        | 7.16 (4.64-11.70) | --               | 6.34 (3.90-10.86) | 6.95 (1.36-127.14) |
| 8-10                                         | 5.41 (4.88-6.09)  | --               | --                | 3.56 (2.68-4.70)   |
| Unknown                                      | 2.43 (1.99-2.97)  | --               | --                | 1.64 (1.23-2.19)   |
| <b><i>Area Deprivation Index (ADI)†</i></b>  |                   |                  |                   |                    |
| ADI 1 <sup>st</sup> quartile                 | Reference         | Reference        | Reference         | Reference          |
| ADI 2 <sup>nd</sup> quartile                 |                   | 0.88 (0.78-0.99) | 0.96 (0.81-1.14)  | 0.91 (0.74-1.12)   |
| ADI 3 <sup>rd</sup> quartile                 |                   | 0.85 (0.75-0.96) | 0.81 (0.69-0.96)  | 0.60 (0.50-0.73)   |
| ADI 4 <sup>th</sup> quartile                 |                   | 0.88 (0.77-0.99) | 0.77 (0.64-0.91)  | 0.69 (0.57-0.85)   |
| <b><i>Urologist Density per 100,000‡</i></b> |                   |                  |                   |                    |
| 0                                            | Reference         | Reference        | Reference         | Reference          |
| 0-2                                          | 1.59 (1.37-1.84)  | 1.46 (1.18-1.81) | 1.97 (1.51-2.58)  | 1.48 (1.10-2.00)   |
| 2-4                                          | 1.29 (1.13-1.47)  | 1.19 (0.98-1.45) | 1.57 (1.23-1.98)  | 1.22 (0.93-1.59)   |
| 4-6                                          | 1.28 (1.11-1.47)  | 1.16 (0.94-1.42) | 1.56 (1.21-1.99)  | 1.24 (0.93-1.63)   |
| >6                                           | 1.08 (.85-1.38)   | 1.04 (0.74-1.48) | 0.85 (0.57-1.29)  | 1.86 (1.04-3.44)   |

Abbreviations: CI, confidence interval; NOS, not otherwise specified; PSA, prostate-specific antigen, 426  
 RUCA, Rural-Urban Commuting Area Codes; ADI, Area Deprivation Index

†ADI scores based on zip code, grouped by quartile, with 1<sup>st</sup> quartile being least deprived and 4<sup>th</sup> quartile being most deprived.

‡ Urologist density was obtained from Area Resource File 2006<sup>14</sup>. Urologist density per county was 430 obtained for each patient using their zip code.
